# Supplementary material for: Preparation and electrochemical performance of a porous polymer-derived silicon carbonitride anode by hydrofluoric acid etching for lithium ion batteries
Source: Royal Society of Chemistry journal article supplement (doi:10.1039/c4ra01086h), 2014-01-01
Supplement: c4ra01086h1.pdf [file c4ra01086h1.pdf]

## Supplementary Information

### **Preparation and electrochemical performance of porous polymer-derived silicon carbonitride anode by hydrofluoric acid etching for lithium ion batteries**

Ningning Feng, Yan Feng\*, Yuzhen Wei and Xiaopu Zhou

Tianjin Key Laboratory of Structure and Performance for Functional Molecules; Key Laboratory of Inorganic-Organic Hybrid Functional Material Chemistry, Ministry of Education; College of Chemistry, Tianjin Normal University, Tianjin 300387, China.

#### **Corresponding Author**

\*E-mail: [hxxyfy@mail.tjnu.edu.cn](mailto:hxxyfy@mail.tjnu.edu.cn). Tel.: +86-22-2376-1006

#### Supplementary Information List:

**Fig.S1** EDX and element content in unetched SiCN (**a**) and SiCN-10-HF materials (**b**).

**Fig.S2** XPS analysis of survey of unetched SiCN (**a**) and SiCN-10-HF materials (**b**).

**Fig.S3** SEM images of the unetched SiCN anode before cycling (**a**) and after 1 (**c**), 10 (**e**), 100 (**g**) cycles; and SiCN-10-HF anode before cycling (**b**), and after 1 (**d**), 10 (**f**), 100 (**h**) cycles.

**Tab.S1** Atomic percent of elements on the surface of unetched SiCN and SiCN-10-HF materials determined by XPS analysis.

**Fig.S1** EDX and element content in unetched SiCN (a) and SiCN-10-HF materials (b).

(a)

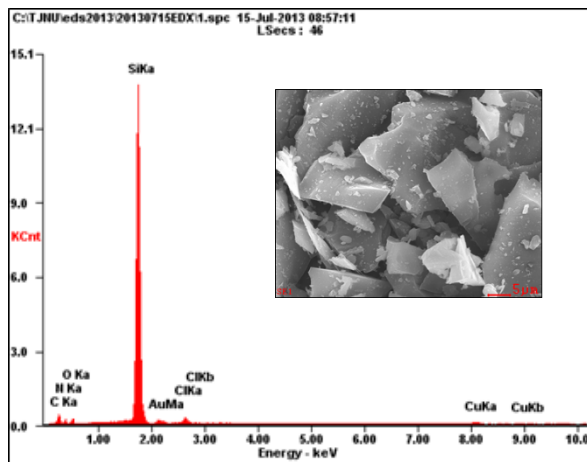

| <i>Element</i> | <i>Wt%</i> | <i>At%</i> |
|----------------|------------|------------|
| <i>CK</i>      | 27.46      | 42.90      |
| <i>NK</i>      | 12.35      | 16.54      |
| <i>OK</i>      | 05.71      | 06.70      |
| <i>SiK</i>     | 48.47      | 32.38      |
| <i>AuM</i>     | 03.07      | 00.29      |
| <i>CIK</i>     | 01.35      | 00.72      |
| <i>CuK</i>     | 01.59      | 00.47      |
| <i>Matrix</i>  | Correction | ZAF        |

(b)

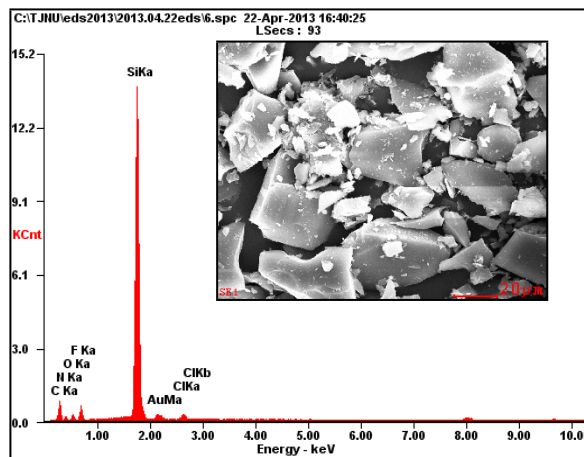

| <i>Element</i> | <i>Wt%</i> | <i>At%</i> |
|----------------|------------|------------|
| <i>CK</i>      | 37.02      | 53.67      |
| <i>NK</i>      | 07.99      | 09.94      |
| <i>OK</i>      | 04.68      | 05.10      |
| <i>FK</i>      | 06.90      | 06.33      |
| <i>SiK</i>     | 38.97      | 24.16      |
| <i>AuM</i>     | 03.42      | 00.30      |
| <i>CIK</i>     | 01.01      | 00.50      |
| <i>Matrix</i>  | Correction | ZAF        |

**Fig.S2** XPS analysis of survey of unetched SiCN **(a)** and SiCN-10-HF materials **(b)**.

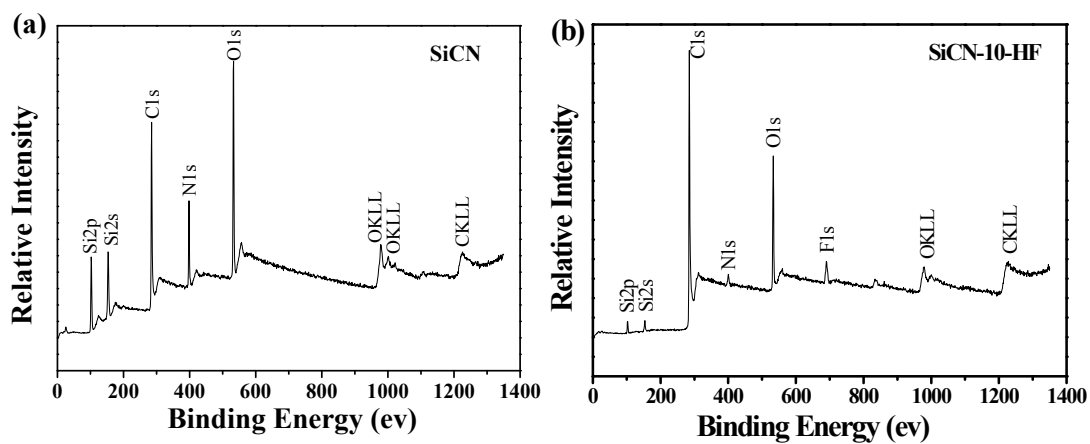

**Fig.S3** SEM images of the unetched SiCN anode before cycling **(a)** and after 1 **(c)**, 10 **(e)**, 100 **(g)** cycles; and SiCN-10-HF anode before cycling **(b)**, and after 1 **(d)**, 10 **(f)**, 100 **(h)** cycles.

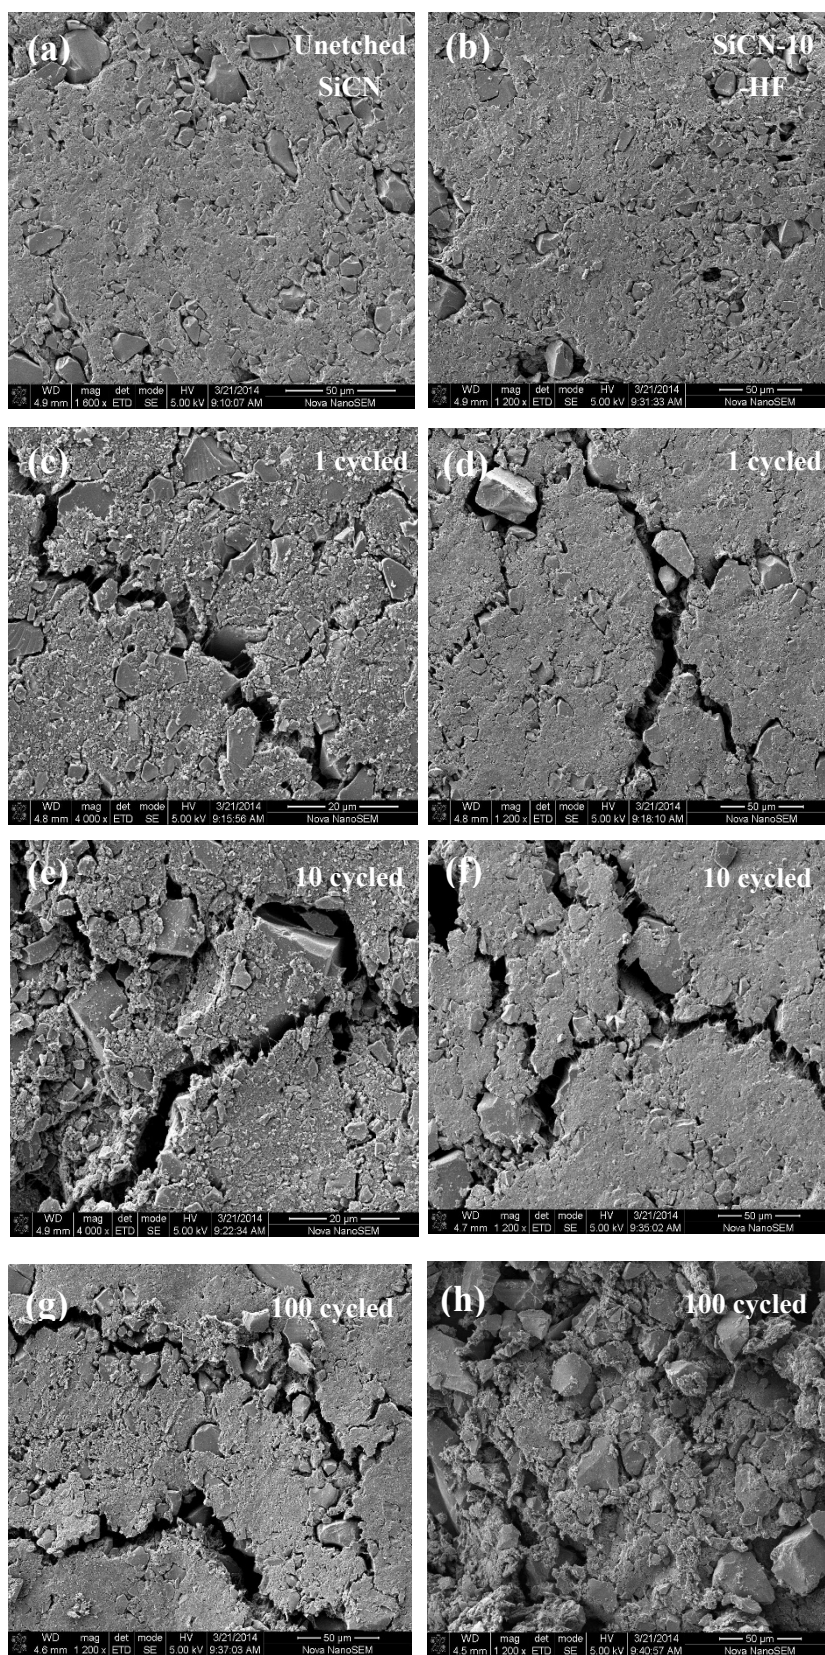

**Tab.S1** Atomic percent of elements on the surface of unetched SiCN and SiCN-10-HF materials determined by XPS analysis.

| Sample     | In atomic % from XPS |       |       |       |      |
|------------|----------------------|-------|-------|-------|------|
|            | Si                   | C     | N     | O     | F    |
| SiCN       | 22.13                | 45.44 | 11.21 | 21.22 | --   |
| SiCN-10-HF | 3.86                 | 74.94 | 3.74  | 13.8  | 3.66 |
